# Supplementary material
Source: MDPI journal article supplement (https://www.mdpi.com/2076-3417/10/19/6808)
Supplement: s1 [file s1]

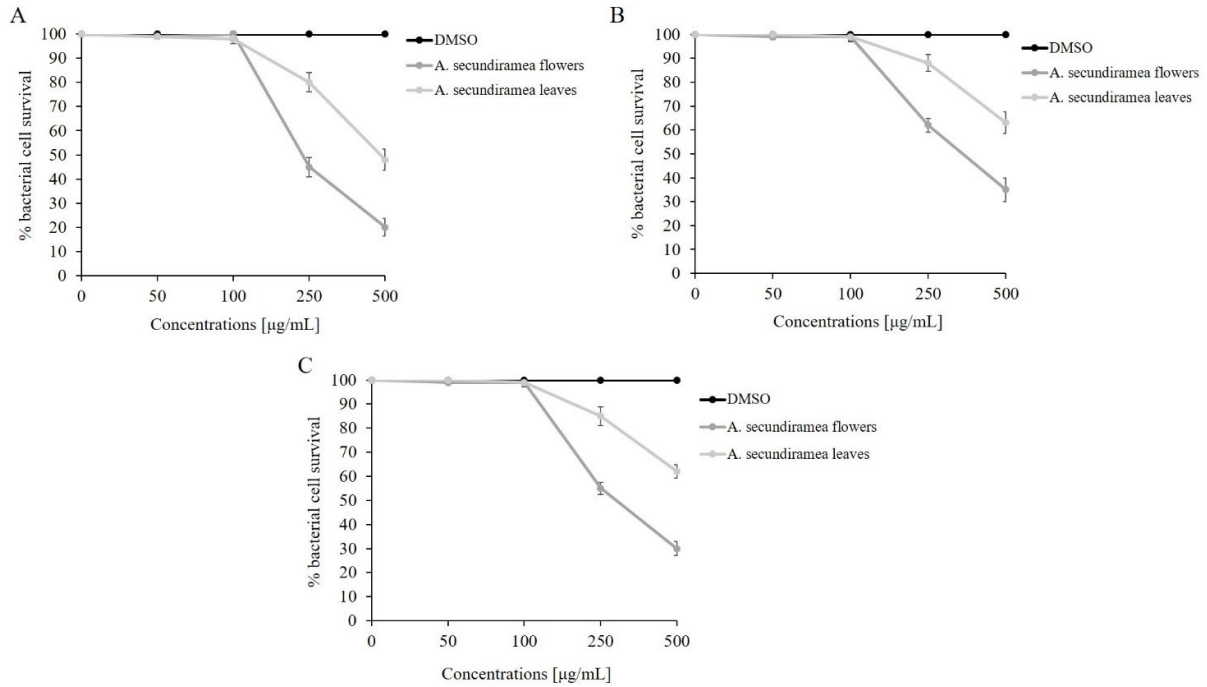

**Figure S1.** Antimicrobial activity of *A. secundiramea* essential oils from flowers and leaves at different concentrations (0, 50, 100, 250, 500 µg/mL) evaluated by colony count assay, against *Escherichia coli* DH5α (panel A), *Pseudomonas aeruginosa* PAOI (panel B) and *Staphylococcus aureus* ATCC 6538P (panel C) strains. The negative control is represented by DMSO (2%). The % of bacterial survival is represented on the y axis. The assays were performed for three independent experiments.

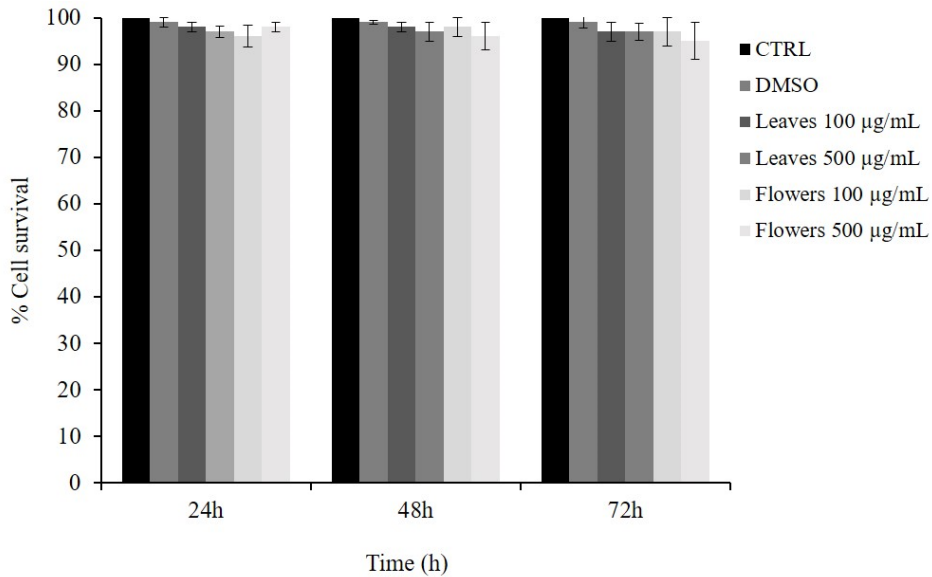

**Figure S2.** Effects of *A. secundiramea* essential oils from flowers and leaves at different times (24, 48 and 72 hours) at two different concentrations (100 and 500 µg/mL) on the viability of HaCat cells by MTT assay. The negative control is represented by DMSO (2%). The error bars represent the standard errors for six replicas.
